# Supplementary material
Source: HighWire-hosted journal article supplement (https://bmjopen.bmj.com/content/11/10/e053114)
Supplement: inline-supplementary-material-1 [file inline-supplementary-material-1.pdf]

**Supplementary Table 1: Characteristics of the analytic sample**

| Country             | n     | World Bank<br>Income<br>Classification | GDP per capita<br>(in USD) | Population size in<br>2017<br>(in millions) | Period of cigarette price<br>data collection |
|---------------------|-------|----------------------------------------|----------------------------|---------------------------------------------|----------------------------------------------|
| <b>Botswana</b>     | 1,618 | Upper Middle                           | 8,259                      | 2.292                                       | 3rd Jul - 5th Aug, 2018                      |
| <b>Ethiopia</b>     | 1,199 | Low                                    | 772                        | 104.957                                     | 14th Jul - 23rd Jul, 2018                    |
| <b>Lesotho</b>      | 4,569 | Lower Middle                           | 1,299                      | 2.233                                       | 14th Jun - 3rd Jul, 2018                     |
| <b>Namibia</b>      | 4,143 | Upper Middle                           | 5,932                      | 2.534                                       | 25th Jun - 22nd Jul, 2018                    |
| <b>Nigeria</b>      | 92    | Lower Middle                           | 2,028                      | 190.886                                     | 27th Jun - 27th Jul, 2018                    |
| <b>South Africa</b> | 6,088 | Upper Middle                           | 6,374                      | 56.717                                      | 17th Jun - 30th Jul, 2018                    |
| <b>Zambia</b>       | 88    | Lower Middle                           | 1,540                      | 17.094                                      | 18th Jul, 2018                               |
| <b>Zimbabwe</b>     | 4,550 | Low                                    | 2,147                      | 16.530                                      | 12th Jun - 28th Jul, 2018                    |

**Supplementary Table 2. Quantity of cigarettes available in 8 African countries.**

| Country      | Single (%) | 10 pack (%) | 20 pack (%) | Other* (%) |
|--------------|------------|-------------|-------------|------------|
| Botswana     | 8.0        | 9.2         | 77.9        | 4.8        |
| Ethiopia     | 100        | 0           | 0           | 0          |
| Lesotho      | 99.6       | 0.02        | 0.28        | 0.02       |
| Namibia      | 0.80       | 0           | 94.5        | 4.6        |
| Nigeria      | 11.9       | 0           | 80.4        | 7.6        |
| South Africa | 25.3       | 5.9         | 64.7        | 4.0        |
| Zambia       | 28.4       | 0           | 65.9        | 5.6        |
| Zimbabwe     | 38.2       | 1.8         | 57.1        | 2.7        |

*Note: The quantities are shown as a percentage. The quantities categories are single cigarette, pack of 10, pack of 20 and other\*. Other\* includes quantities of 30, 160, 200 or 300 cigarettes. Individual proportions may not add to total due to rounding.*
